# Supplementary material for: Cooperativity between the orthosteric and allosteric ligand binding sites of RORγt
Source: PubMed Central journal article supplement — Proc Natl Acad Sci U S A. 2021 Feb 3;118(6):e2021287118. doi: 10.1073/pnas.2021287118 (PMC8017705; doi:10.1073/pnas.2021287118), 2021-02-03
Supplement: pnas.2021287118.sapp.pdf [file pnas.2021287118.sapp.pdf]

## Supplementary Information for

### Cooperativity between the Orthosteric and Allosteric Ligand Binding Sites of ROR $\gamma$ t

Rens M.J.M. de Vries,<sup>§,†</sup> Femke A. Meijer,<sup>§,†</sup> Richard G. Doveston,<sup>†,‡</sup> Iris A. Leijten-van de Gevel<sup>†</sup> and Luc Brunsveld<sup>†,\*</sup>

<sup>§</sup>These authors contributed equally to this work.

<sup>†</sup> Laboratory of Chemical Biology, Department of Biomedical Engineering and Institute for Complex Molecular Systems, Technische Universiteit Eindhoven, Den Dolech 2, 5612 AZ Eindhoven, The Netherlands.

<sup>‡</sup> Leicester Institute of Structural and Chemical Biology and Department of Chemistry, University of Leicester, University Road, Leicester, UK, LE1 7RH.

\* Luc Brunsveld

Address: P.O. Box 513 (Helix STO 3.37), 5600 MB Eindhoven, The Netherlands

Phone number: +3140 247 2870/5378

Email: l.brunsveld@tue.nl

#### **This PDF file includes:**

Figures S1 to S26  
Tables S1 to S7  
Legends for Movies S1

#### **Other supplementary materials for this manuscript include the following:**

Movies S1

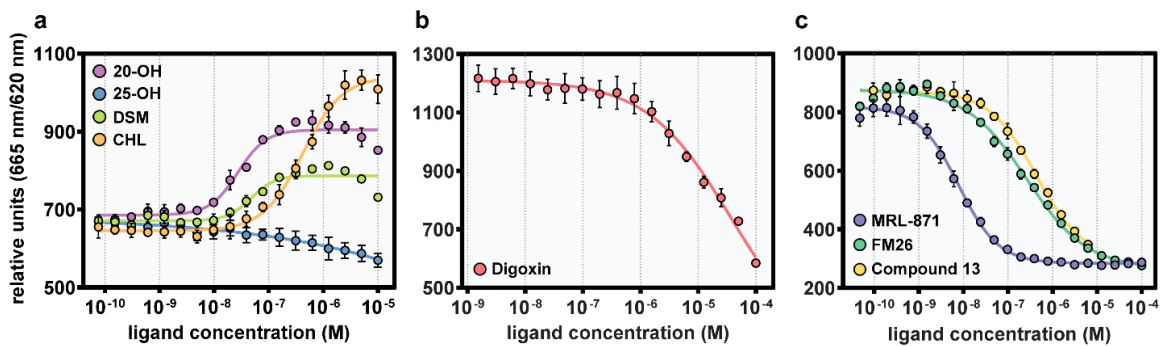

**Fig. S1.** Dose-response curves from the TR-FRET coactivator assay: titration of all ligands used in the manuscript to a fixed concentration of the ROR $\gamma$ t LBD (20 nM). a Cholesterol, desmosterol, 20 $\alpha$ -hydroxycholesterol and 25-hydroxycholesterol (orthosteric agonists). b Digoxin (orthosteric inverse agonist). c MRL-871, FM26 and compound 13 (allosteric inverse agonists). Data recorded in triplicate from three independent experiments (one representative dataset shown). Error bars represent the SD of the mean.

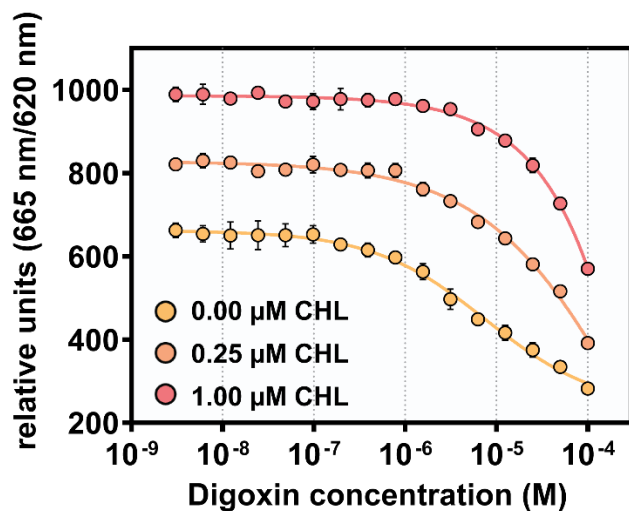

**Fig. S2.** Dose-response curves from the competitive TR-FRET coactivator recruitment assay with fixed concentrations of cholesterol (0.00  $\mu$ M, 0.25  $\mu$ M and 1.00  $\mu$ M) and titration of digoxin. Data recorded in triplicate from three independent experiments (one representative dataset shown). Error bars represent the SD of the mean.

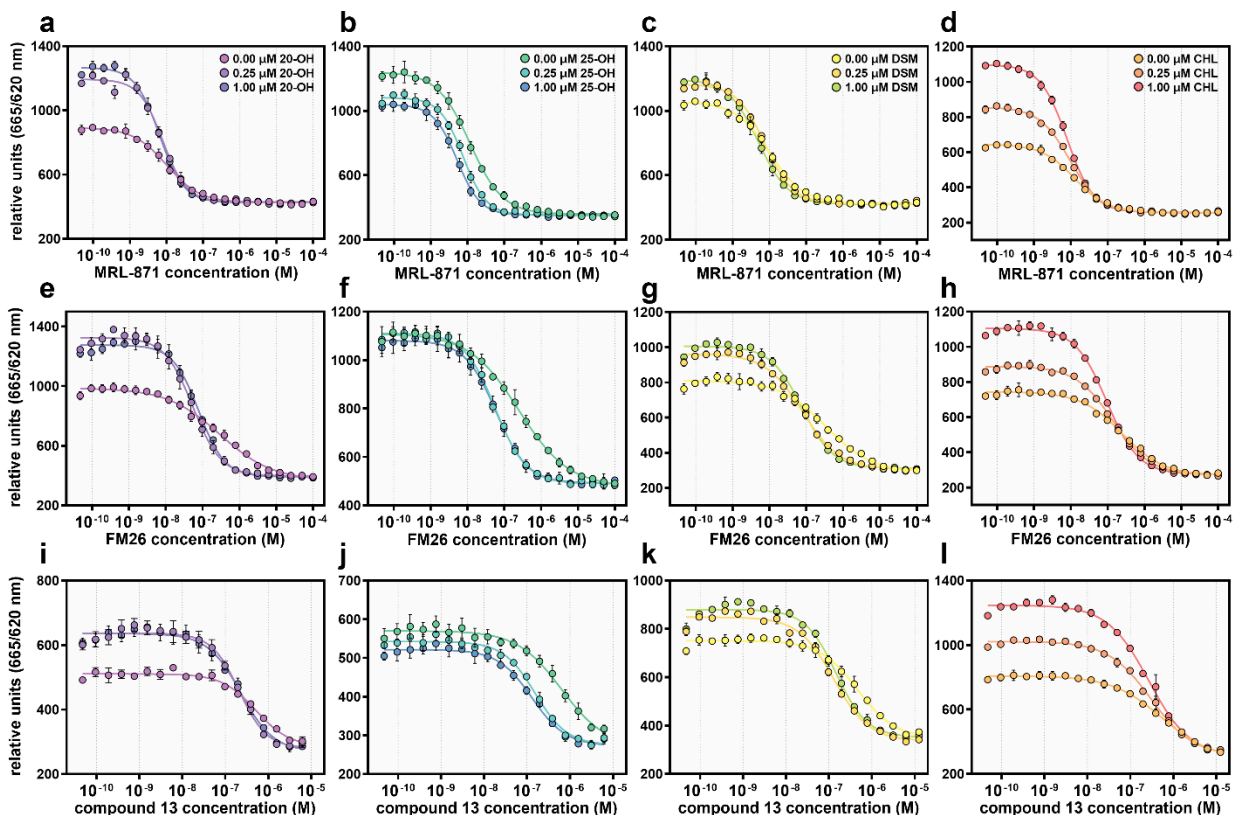

**Fig. S3.** Non-normalized data of the data shown in Figure 3a-l, Dose-response curves of competitive TR-FRET coactivator recruitment assays (a-l) by titration of allosteric ligands MRL-871 (a-d), FM26 (e-h) and compound 13 (i-l) to ROR $\gamma$ t in the presence of fixed concentrations of 20 $\alpha$ -hydroxycholesterol (20-OH) (a,e,i), 25-hydroxycholesterol (25-OH) (b,f,j), desmosterol (DSM) (c,g,k) and cholesterol (CHL) (d,h,j) (0.00  $\mu$ M, 0.25  $\mu$ M and 1.00  $\mu$ M). Data recorded in triplicate from three independent experiments (one representative dataset shown). Error bars represent the SD of the mean.

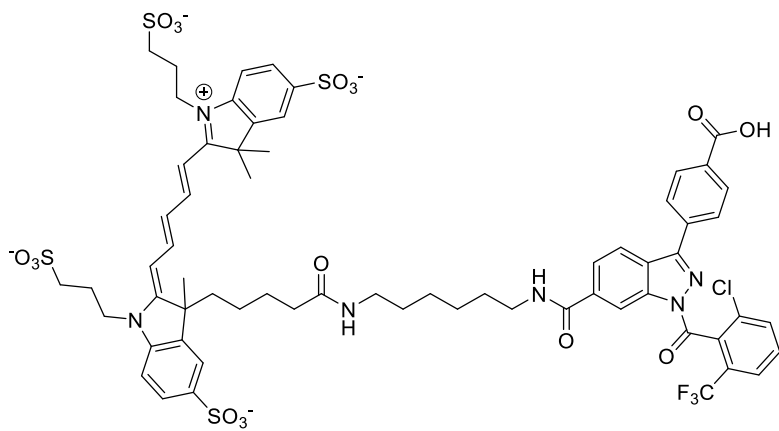

**Fig. S4.** Chemical structure of AlexaFluor-MRL-871 probe.

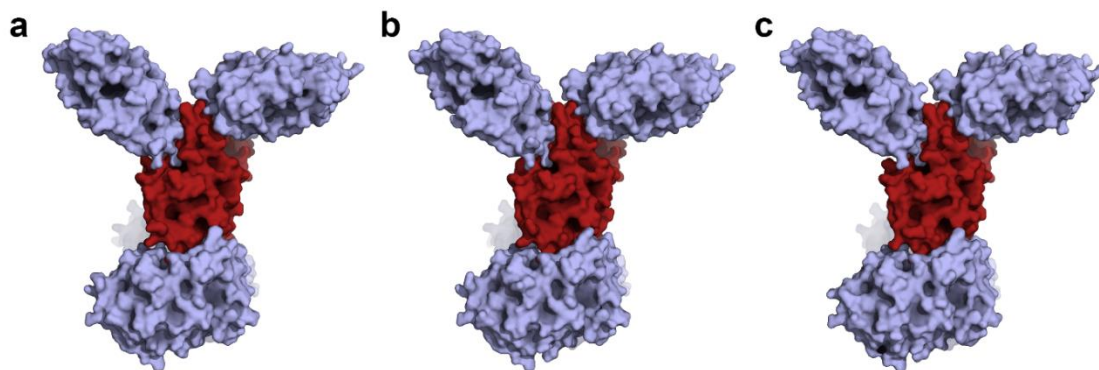

**Fig. S5.** Comparison of the crystal packing of RORyt using different crystallization buffers. The RORyt monomer is shown as a red surface and directly neighboring crystallographic symmetry-mates are shown in blue. **a**, 20 $\alpha$ -hydroxycholesterol + MRL-871 without the addition of crystallization buffer **b**, 25-hydroxycholesterol + MRL-871 in 1.6M AmSO<sub>4</sub> + 0.1M Tris (pH=8.5) **c**, desmosterol + MRL-871 in 0.2M MgCl<sub>2</sub> + 6% PEG6000 + 0.1 M Tris (pH=8.5).

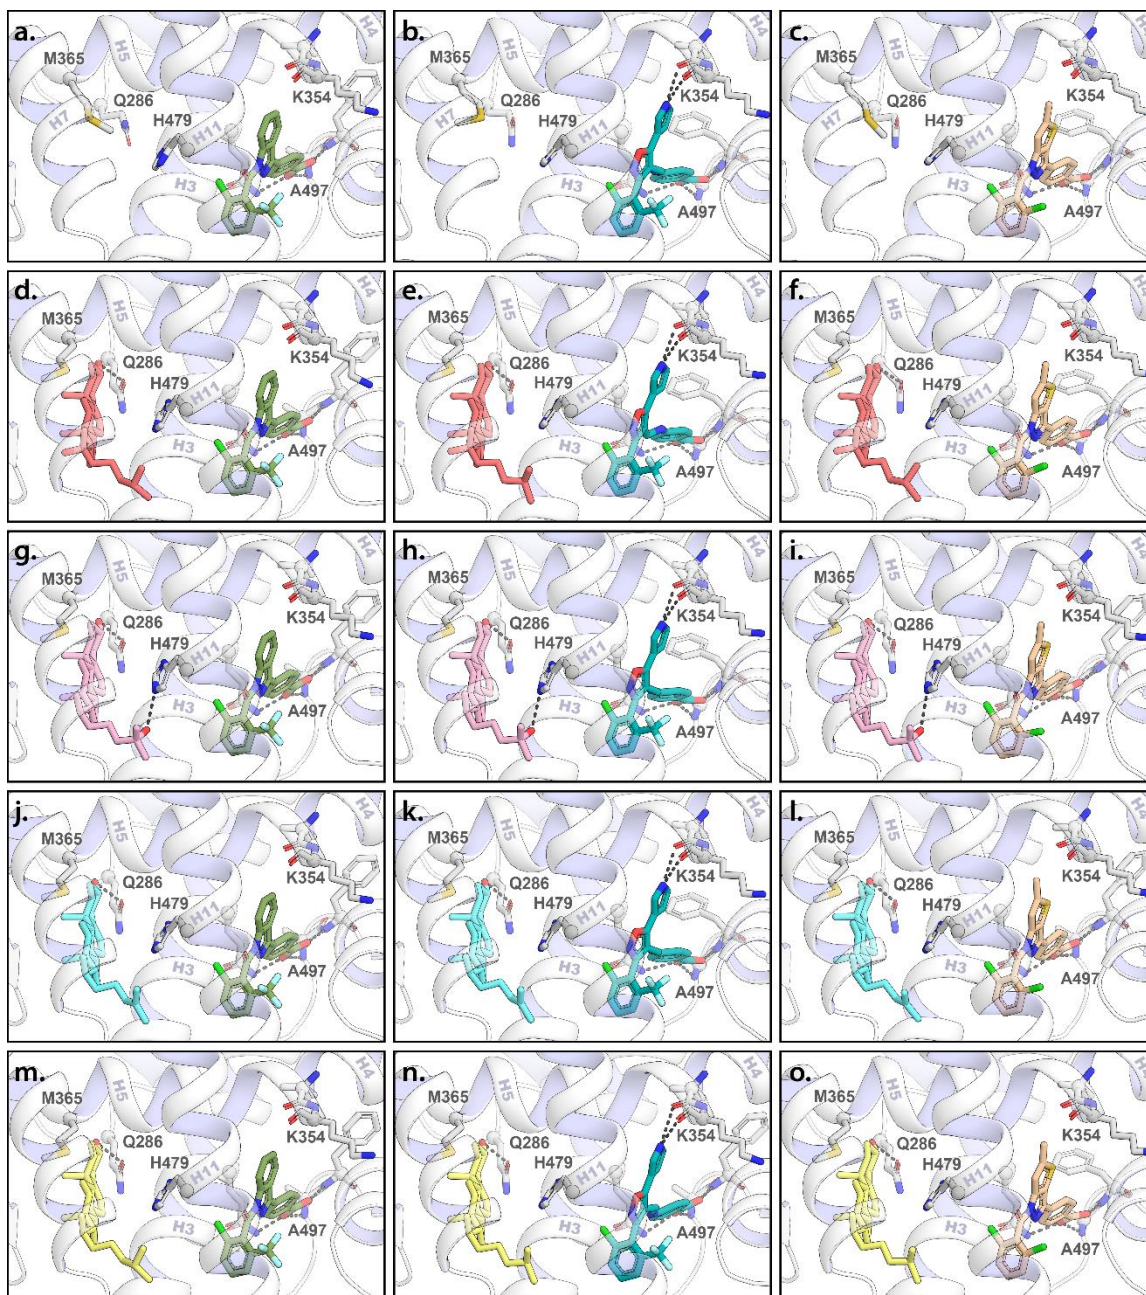

**Fig S6.** Crystal structures of ROR $\gamma$ t in complex with orthosteric and allosteric ligands. a-c, Focused view of the orthosteric and allosteric ligand-binding pockets from the previously published crystal structures containing only an allosteric ligand (MRL-871 (PDB: 5C4O) in green; FM26 (PDB: 6SAL) in teal or compound 13 (PDB: 6TLM) in brown). d-o, The orthosteric and allosteric ligand-binding pocket of ROR $\gamma$ t in the presence of 12 combinations of orthosteric and allosteric ligands (20 $\alpha$ -hydroxycholesterol in red, 25-hydroxycholesterol in pink, desmosterol in blue and cholesterol in yellow).

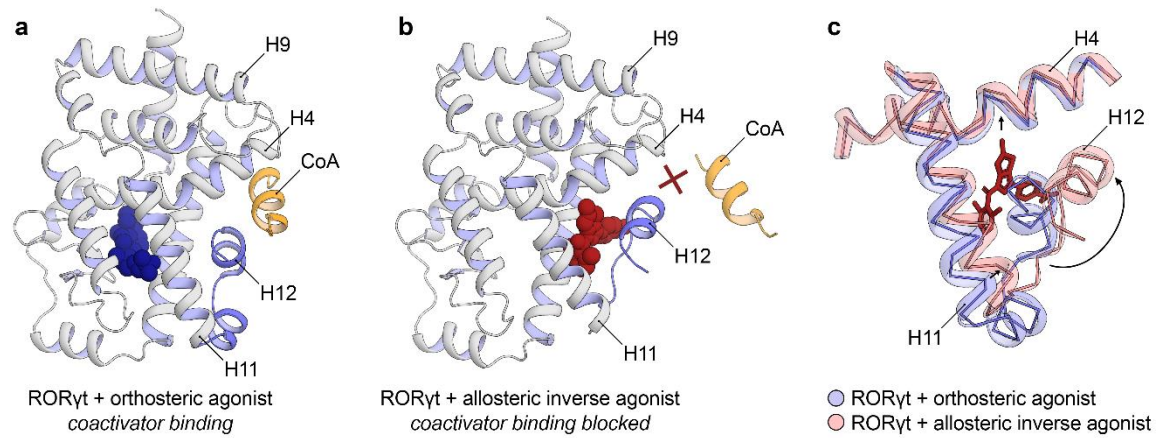

**Fig S7.** Crystal structure of ROR $\gamma$ t in complex with **a**, an orthosteric agonist and a coactivator peptide (PDB: 3L0L) **b**, allosteric inverse agonist (PDB: 6TLM), which induces a conformation of helix 12 that prevents coactivator binding. **c**, Comparison of the allosteric ligand-binding pocket of ROR $\gamma$ t. ROR $\gamma$ t in complex with an orthosteric agonist and an allosteric inverse agonist are shown in blue and red, respectively. The arrows indicate the helix movement upon binding an allosteric inverse agonist.



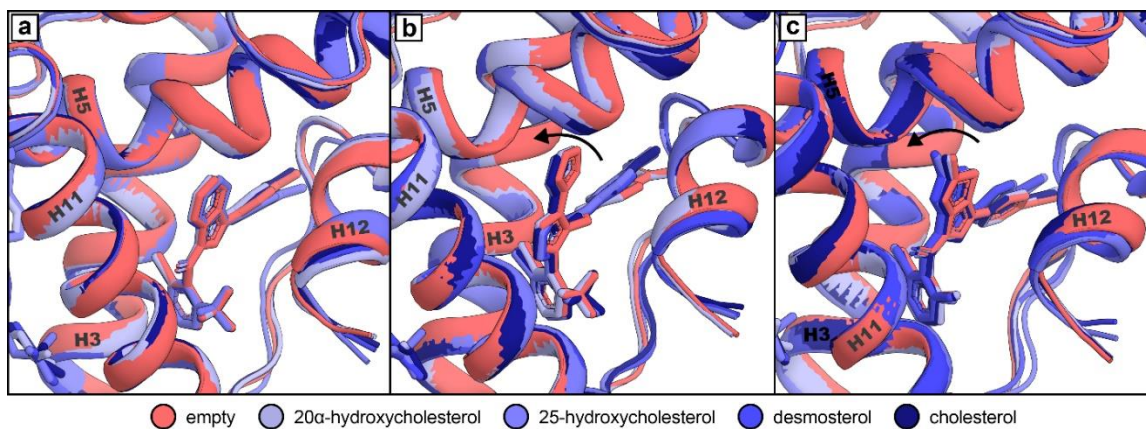

**Fig. S8.** Comparison of the allosteric ligand binding mode in the crystal structures in absence (red) or presence of orthosteric ligands (blue-tones). Structural overlay of crystal structures containing **a**, MRL-871 **b**, FM26 **c**, compound 13.

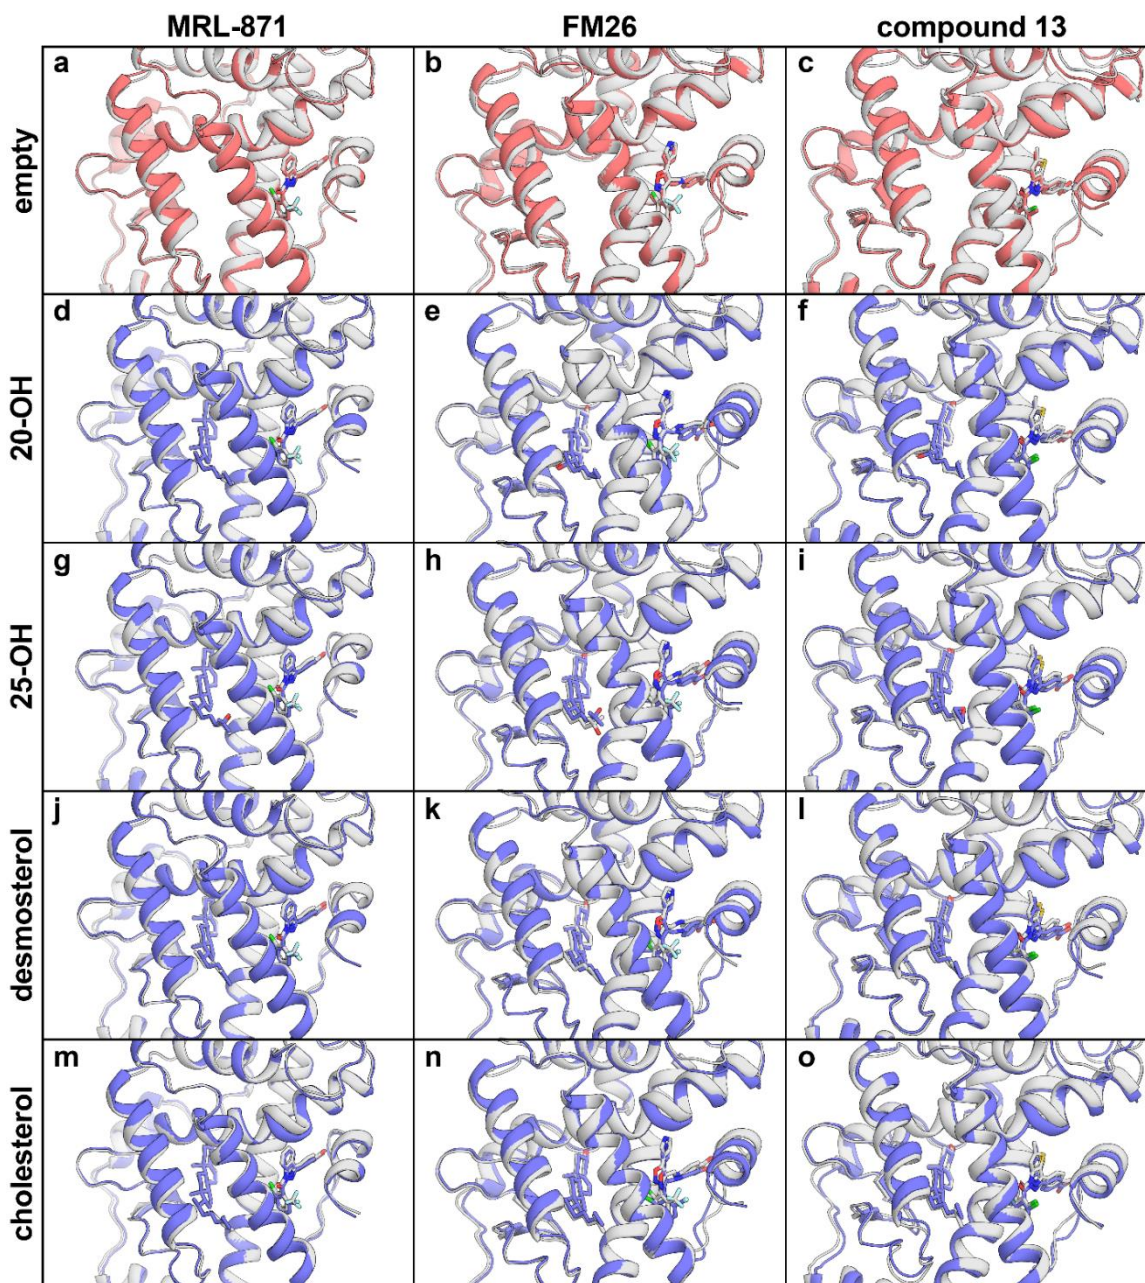

**Fig. S9.** Comparison of the crystal structure (white cartoon) and the average coordinates derived from the molecular dynamics simulations (red or blue cartoon). For the averaged structures, some unphysical bond lengths are present due to the averaging process.

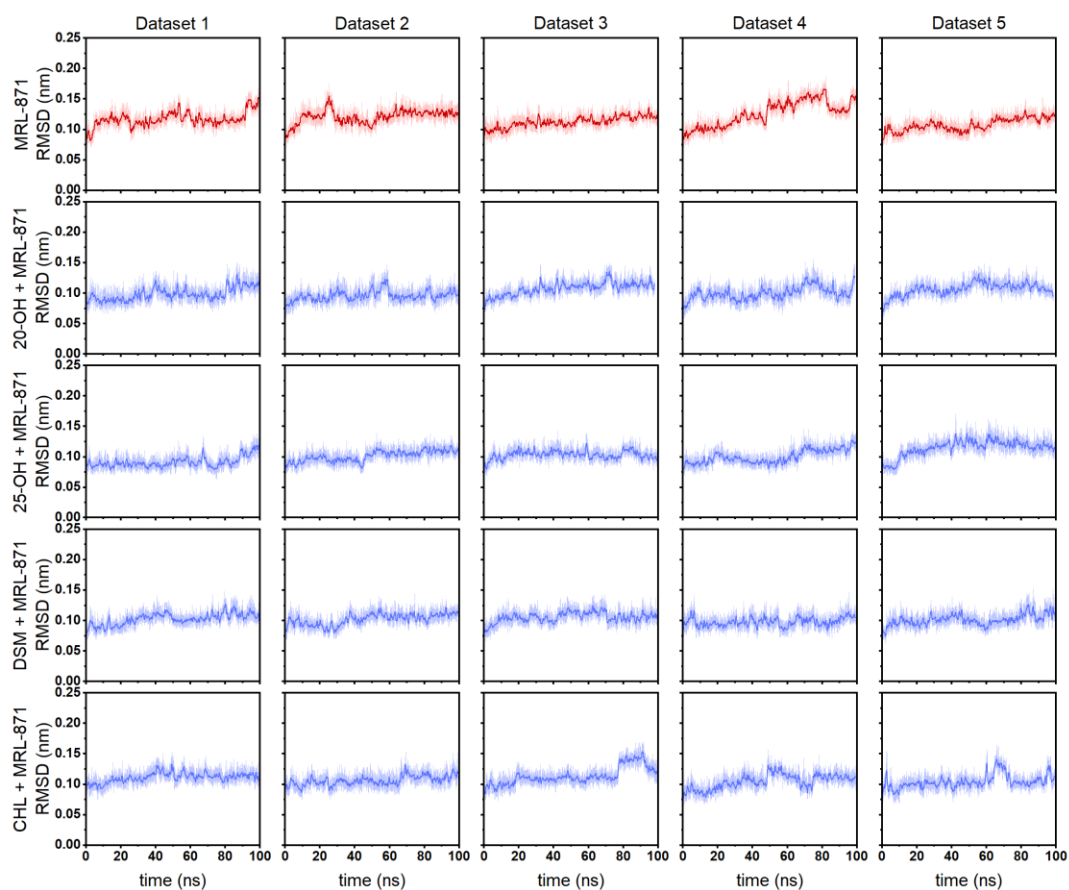

**Fig. S10.** Root mean square deviation (RMSD) of RORyt in complex with MRL-871 (red) and MRL-871 in presence of different orthosteric modulators (blue). Data of each dataset was plotted individually using the first frame of each simulation was used as the reference structure. The dark line was obtained using the Savitzky-Golay smoothing method using a 100-point quadratic polynomial.

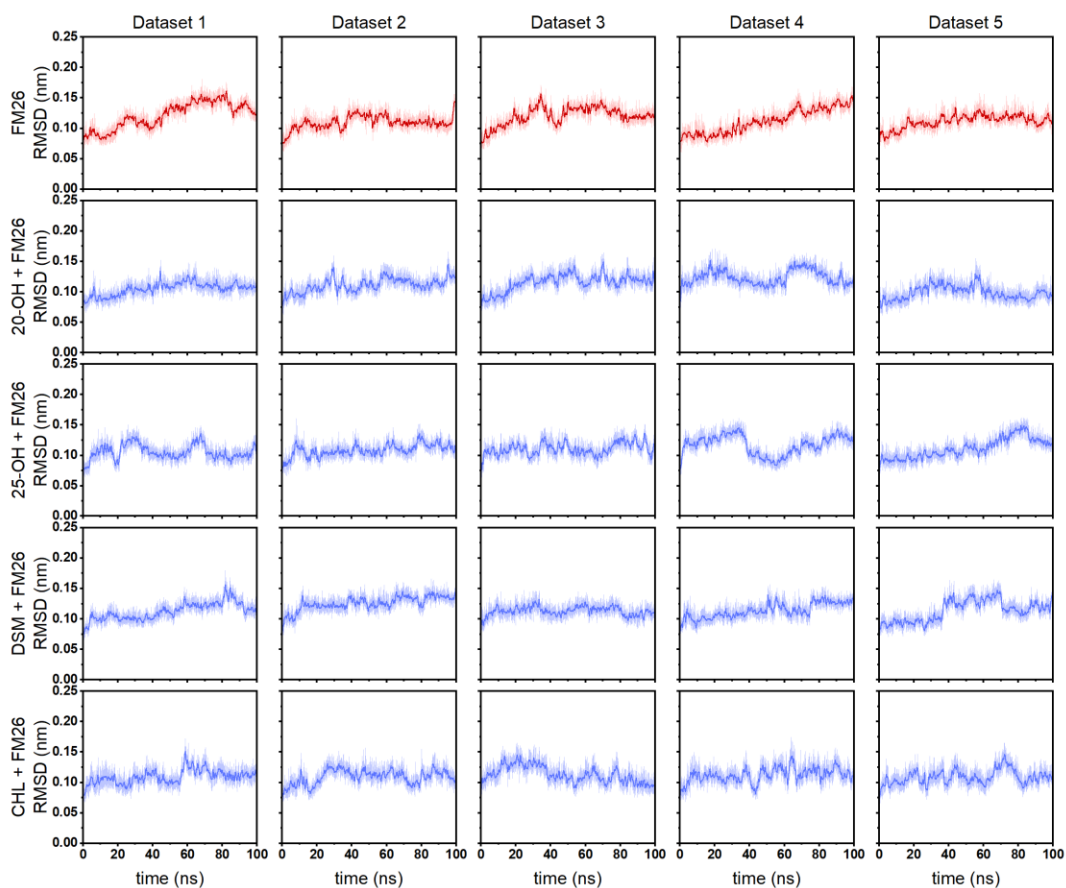

**Fig. S11.** Root mean square deviation (RMSD) of ROR $\gamma$ t in complex with FM26 (red) and FM26 in presence of different orthosteric modulators (blue). Data of each dataset was plotted individually using the first frame of each simulation was used as the reference structure. The dark line was obtained using the Savitzky-Golay smoothing method using a 100-point quadratic polynomial.

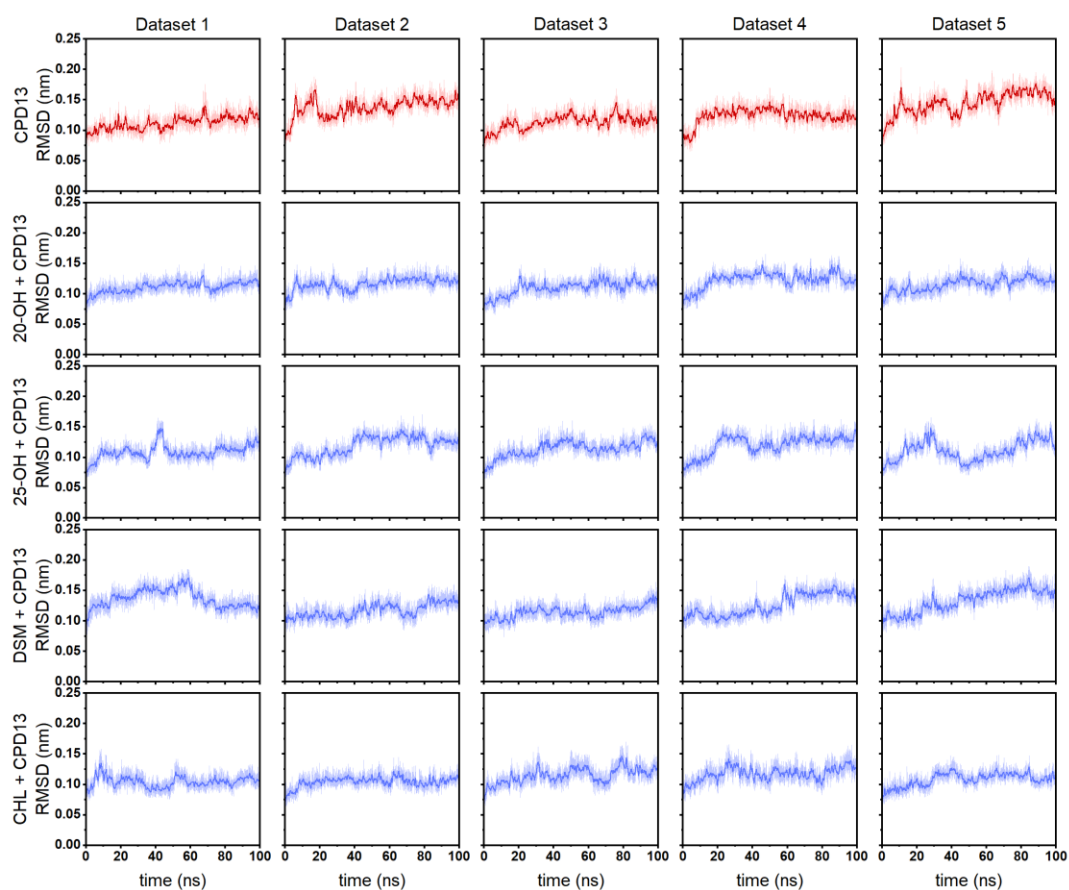

**Fig. S12.** Root mean square deviation (RMSD) of RORyt in complex with compound 13 (red) and compound 13 in presence of different orthosteric modulators (blue). Data of each dataset was plotted individually using the first frame of each simulation was used as the reference structure. The dark line was obtained using the Savitzky-Golay smoothing method using a 100-point quadratic polynomial.

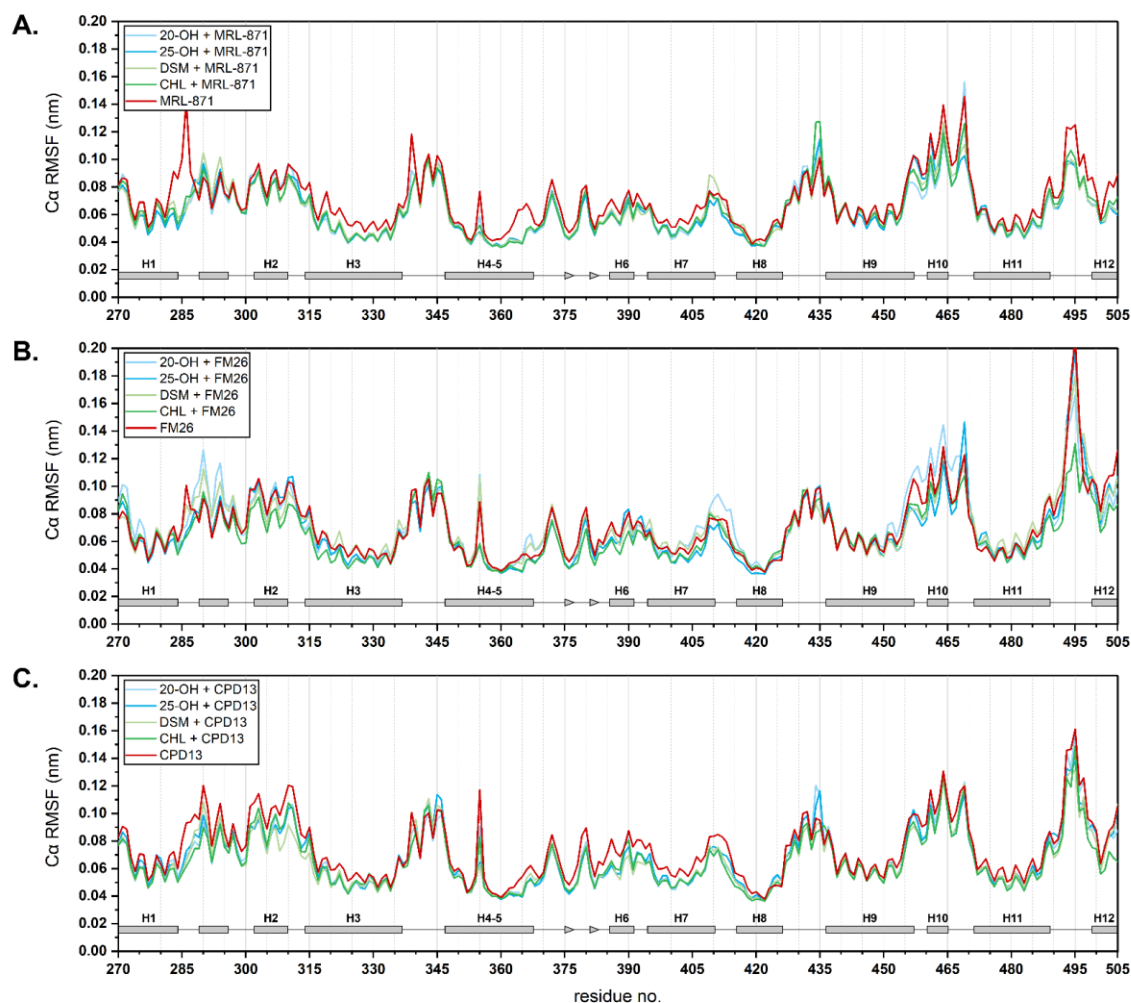

**Fig. S13. a-c,** Average root mean square fluctuation (RMSF) of the  $\alpha$ -carbons of RORyt in complex with different orthosteric and allosteric ligands derived from five simulations per complex. The red lines show the RMSF in absence of an orthosteric modulator. The secondary structure of the protein is represented as a rectangle, triangle and a line for  $\alpha$ -helices,  $\beta$ -sheets and loops respectively.

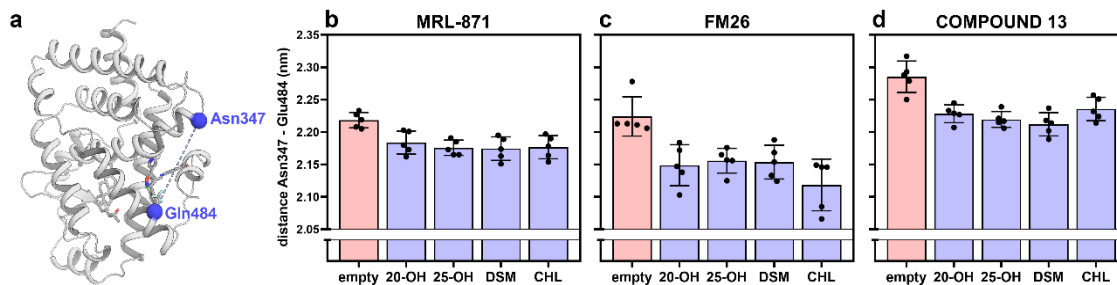

**Fig. S14.** Distance between the alpha carbons of Asn347 and Gln484. a, Cartoon representation of ROR $\gamma$ t showing the positions of the alpha carbons of Asn347 and Gln484 as blue spheres. The dotted line represents the measured distance. b-d, Bars represent the average distance between the alpha carbons of Asn347 and Gln484 over five independent simulations with the individual values represented as black spheres and the error bar showing the standard deviation.

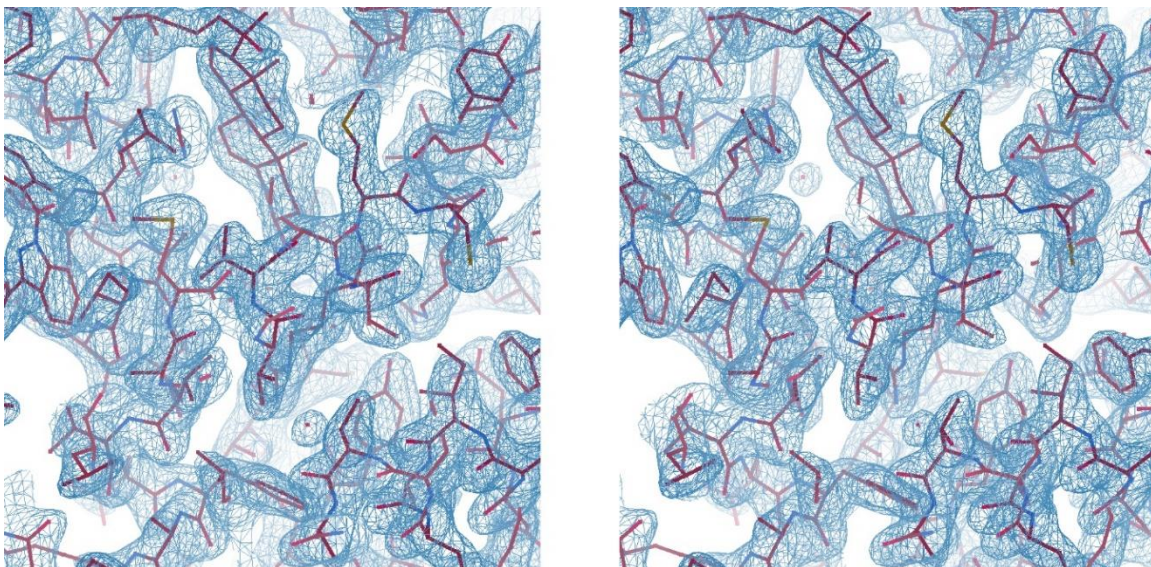

**Fig. S15.** Stereo image of a portion of the electron density map (2Fo-Fc) of RORyt in complex with 20 $\alpha$ -hydroxycholesterol and MRL-871 (6T4U).



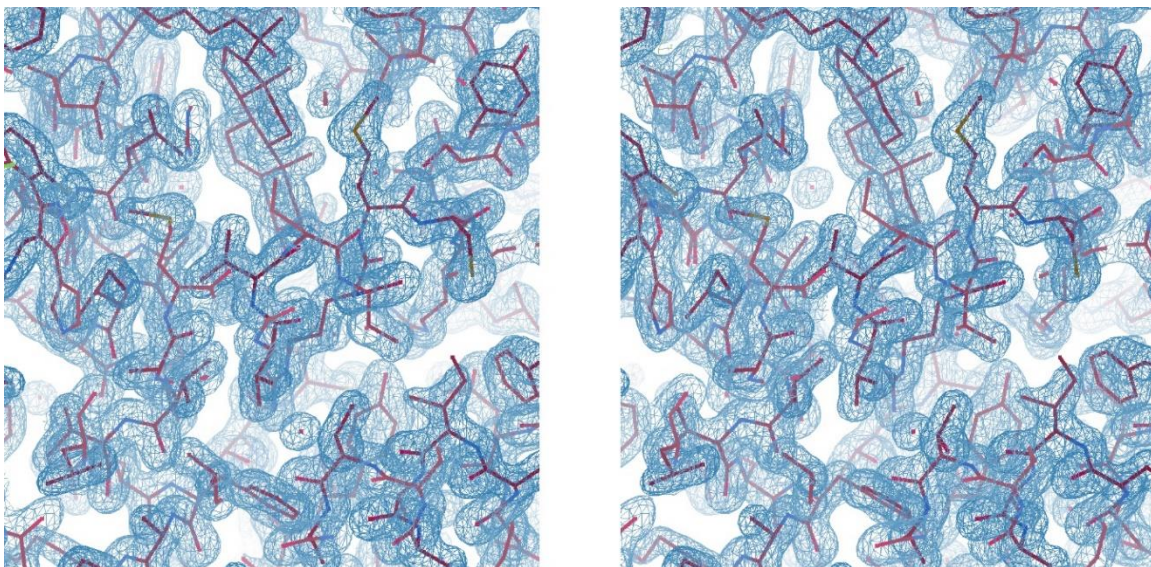

**Fig. S16.** Stereo image of a portion of the electron density map (2Fo-Fc) of RORyt in complex with 20 $\alpha$ -hydroxycholesterol and FM26 (6T4T).

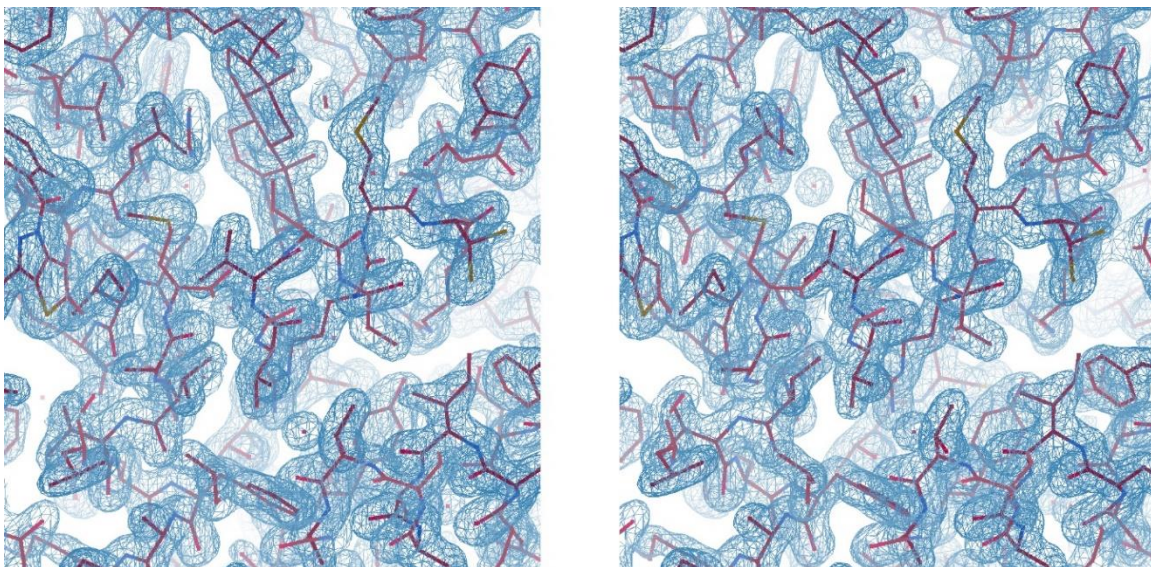

**Fig. S17.** Stereo image of a portion of the electron density map (2Fo-Fc) of ROR $\gamma$ t in complex with 20 $\alpha$ -hydroxycholesterol and compound 13 (6T4W).

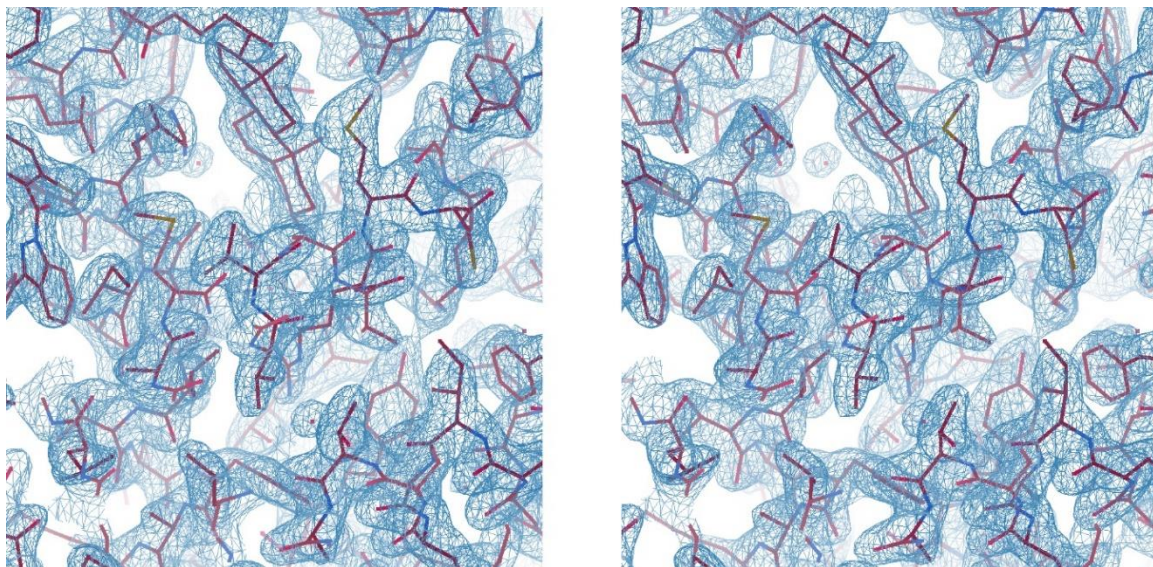

**Fig. S18.** Stereo image of a portion of the electron density map (2Fo-Fc) of ROR $\gamma$ t in complex with 25-hydroxycholesterol and MRL-871 (6T4Y).

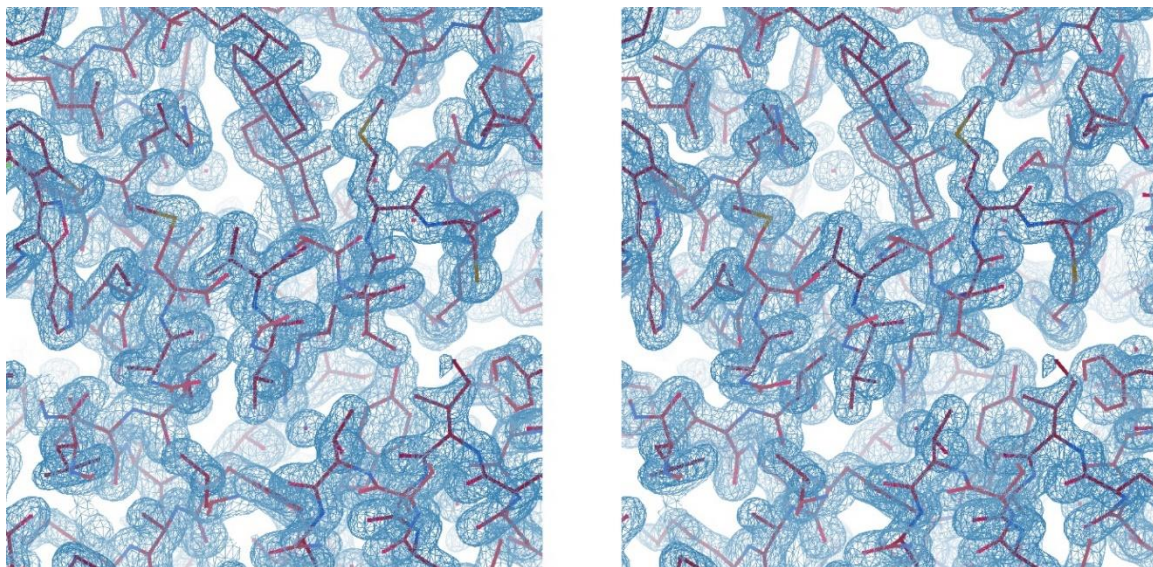

**Fig. S19.** Stereo image of a portion of the electron density map (2Fo-Fc) of RORyt in complex with 25-hydroxycholesterol and FM26 (6T4X).

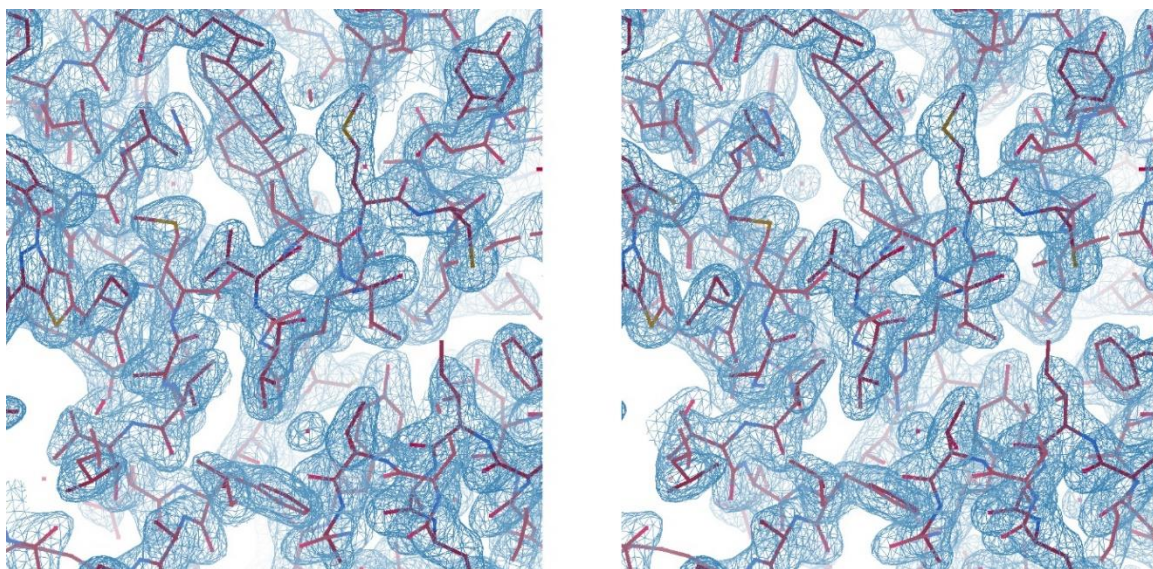

**Fig. S20.** Stereo image of a portion of the electron density map (2Fo-Fc) of ROR $\gamma$ t in complex with 25-hydroxycholesterol and compound 13 (6T50).

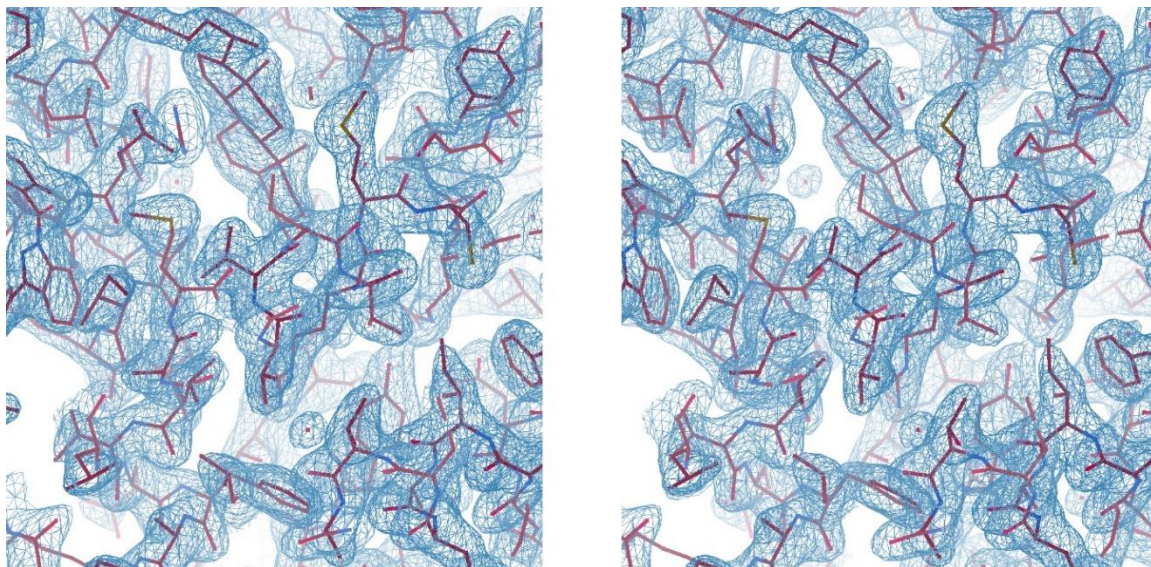

**Fig. S21.** Stereo image of a portion of the electron density map (2Fo-Fc) of RORyt in complex with desmosterol and MRL-871 (6T4K).

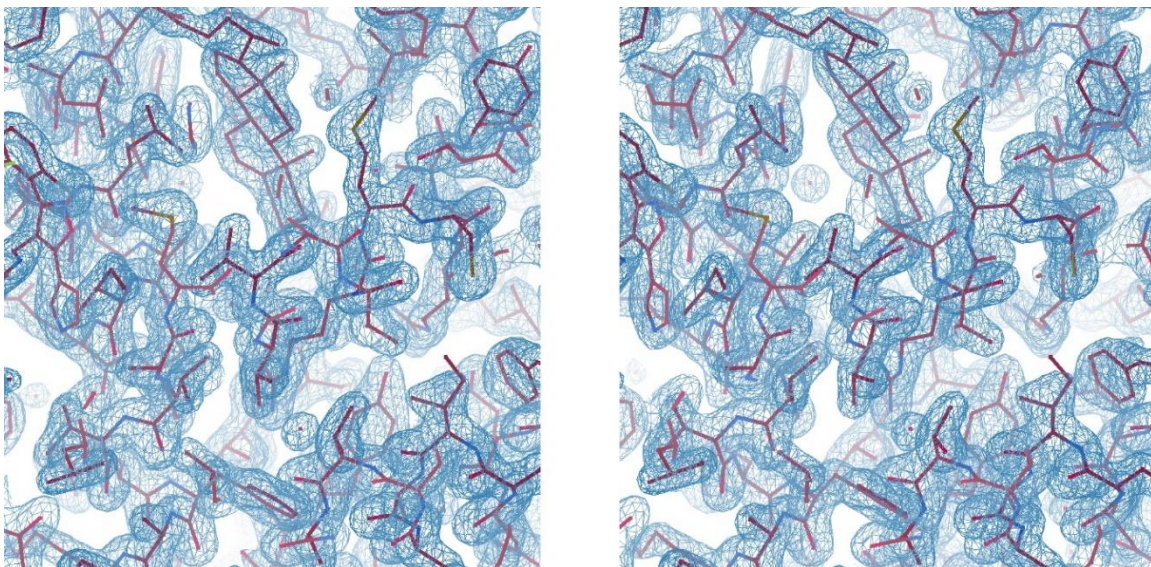

**Fig. S22.** Stereo image of a portion of the electron density map (2Fo-Fc) of ROR $\gamma$ t in complex with desmosterol and FM26 (6T4J).

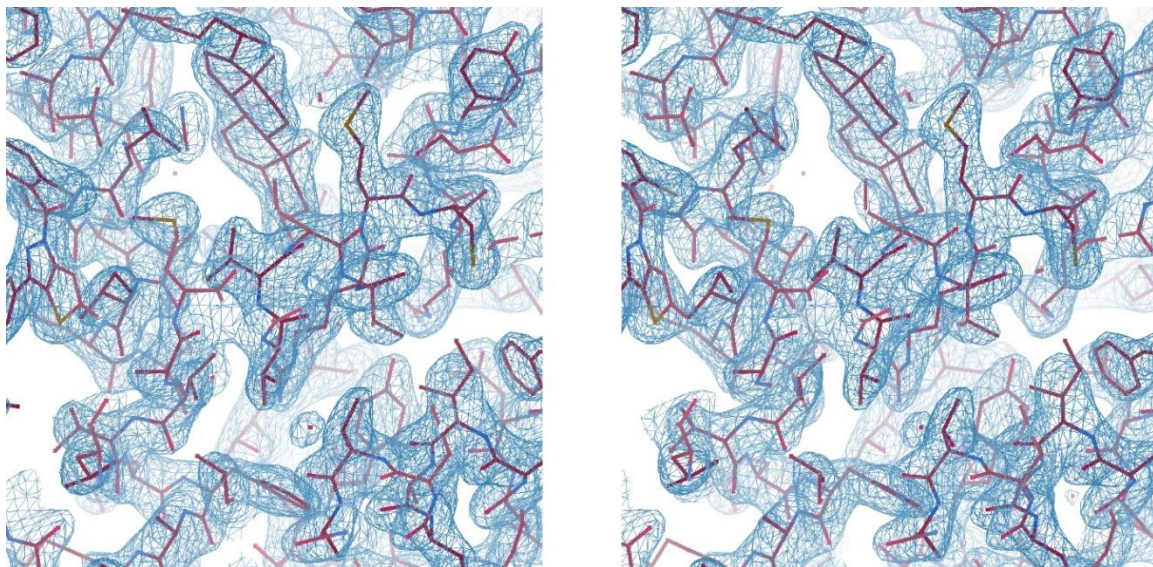

**Fig. S23.** Stereo image of a portion of the electron density map (2Fo-Fc) of RORyt in complex with desmosterol and compound 13 (6TLT).



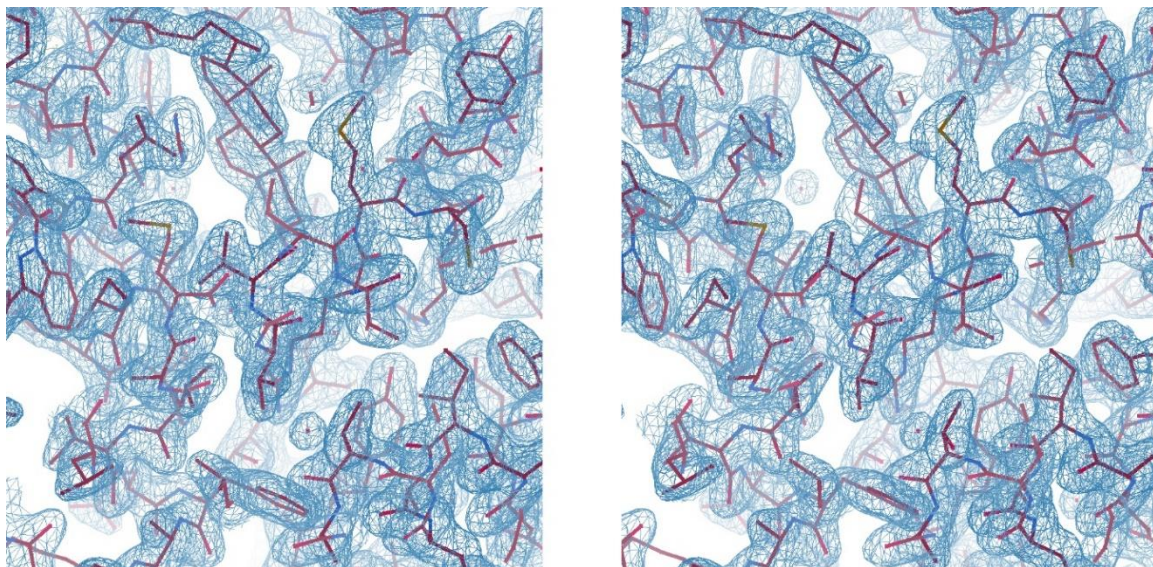

**Fig. S24.** Stereo image of a portion of the electron density map (2Fo-Fc) of RORyt in complex with cholesterol and MRL-871 (6T4I).

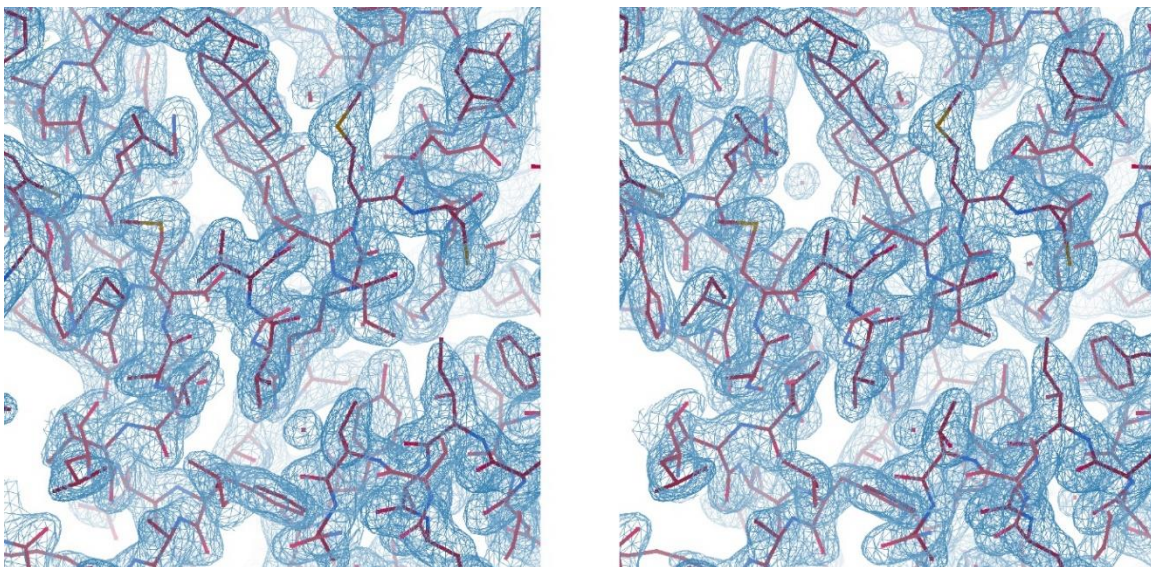

**Fig. S25.** Stereo image of a portion of the electron density map (2Fo-Fc) of RORyt in complex with cholesterol and FM26 (6T4G).

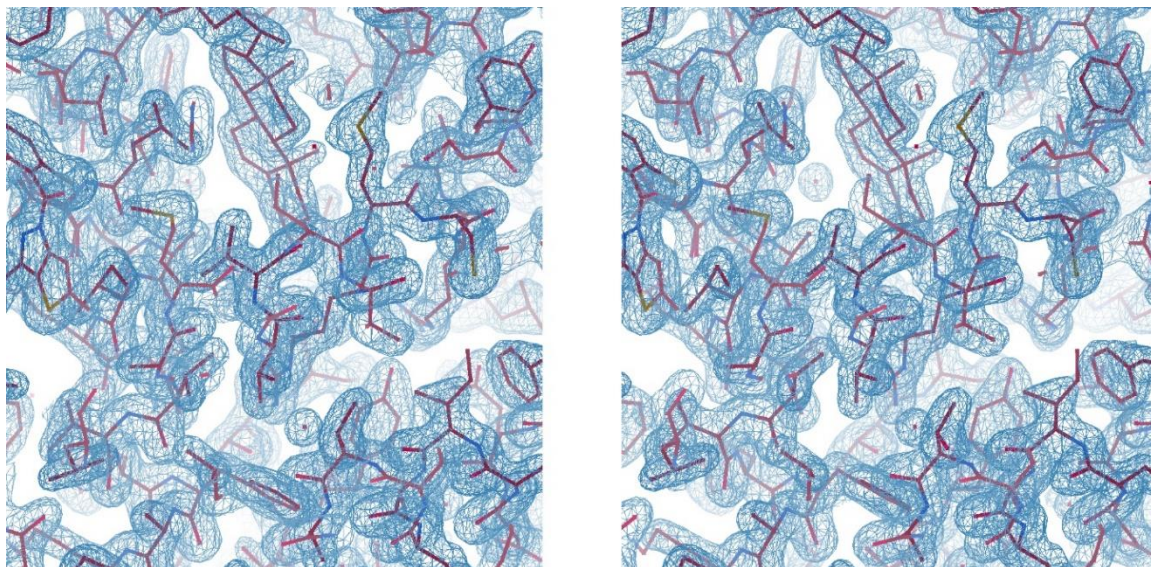

**Fig. S26.** Stereo image of a portion of the electron density map (2Fo-Fc) of RORyt in complex with cholesterol and compound 13 (6TLQ).

**Table S1.** EC<sub>50</sub> & IC<sub>50</sub> values for all compounds, determined in TR-FRET coactivator assays.

|                                    | <b>Compound</b>                 | <b>EC<sub>50</sub>/IC<sub>50</sub> (nM)</b> |
|------------------------------------|---------------------------------|---------------------------------------------|
| <i>Orthosteric agonists</i>        | Cholesterol                     | 416 ± 41                                    |
|                                    | Desmosterol                     | 43.0 ± 7.3                                  |
|                                    | 20 $\alpha$ -hydroxycholesterol | 24.0 ± 2.8                                  |
|                                    | 25-hydroxycholesterol           | Ambiguously                                 |
| <i>Orthosteric inverse agonist</i> | Digoxin                         | 15090 ± 1300                                |
| <i>Allosteric inverse agonists</i> | MRL-871                         | 7.8 ± 0.5                                   |
|                                    | FM26                            | 264 ± 23                                    |
|                                    | Compound 13                     | 425 ± 61                                    |

**Table S2.** IC<sub>50</sub> values observed in the competitive TR-FRET coactivator recruitment assay with fixed concentrations of orthosteric ligands cholesterol and titration of digoxin.

| <b>cholesterol<br/>concentration (μM)</b> | <b>Digoxin<br/>IC<sub>50</sub> (nM)</b> |
|-------------------------------------------|-----------------------------------------|
| 0.00                                      | 7012 ± 588                              |
| 0.25                                      | 33620 ± 1694                            |
| 1.00                                      | 85400 ± 4276                            |

**Table S3.** IC<sub>50</sub> values observed in the competitive TR-FRET coactivator recruitment assay with fixed concentrations of orthosteric ligands 20 $\alpha$ -hydroxycholesterol (20-OH), 25-hydroxycholesterol (25-OH), desmosterol (DSM) and cholesterol (CHL).

| orthosteric ligand<br>concentration ( $\mu$ M) | allosteric ligand                |                               |                                      |       |
|------------------------------------------------|----------------------------------|-------------------------------|--------------------------------------|-------|
|                                                | MRL-871<br>IC <sub>50</sub> (nM) | FM26<br>IC <sub>50</sub> (nM) | compound 13<br>IC <sub>50</sub> (nM) |       |
| 0.00                                           | 10.1 $\pm$ 0.7                   | 296 $\pm$ 34                  | 514 $\pm$ 72                         | 20-OH |
| 0.25                                           | 7.8 $\pm$ 0.3                    | 55 $\pm$ 3                    | 210 $\pm$ 19                         |       |
| 1.00                                           | 6.4 $\pm$ 0.2                    | 79 $\pm$ 4                    | 228 $\pm$ 24                         |       |
| 0.00                                           | 11.6 $\pm$ 0.6                   | 249 $\pm$ 28                  | 629 $\pm$ 173                        | 25-OH |
| 0.25                                           | 7.5 $\pm$ 0.3                    | 57 $\pm$ 2                    | 155 $\pm$ 12                         |       |
| 1.00                                           | 5.2 $\pm$ 0.2                    | 60 $\pm$ 4                    | 131 $\pm$ 13                         |       |
| 0.00                                           | 10.2 $\pm$ 0.6                   | 343 $\pm$ 35                  | 466 $\pm$ 49                         | DSM   |
| 0.25                                           | 7.5 $\pm$ 0.3                    | 80 $\pm$ 4                    | 130 $\pm$ 9                          |       |
| 1.00                                           | 5.0 $\pm$ 0.2                    | 76 $\pm$ 4                    | 148 $\pm$ 11                         |       |
| 0.00                                           | 12.7 $\pm$ 0.6                   | 248 $\pm$ 18                  | 547 $\pm$ 60                         | CHL   |
| 0.25                                           | 9.4 $\pm$ 0.3                    | 138 $\pm$ 6                   | 300 $\pm$ 18                         |       |
| 1.00                                           | 7.8 $\pm$ 0.2                    | 94 $\pm$ 3                    | 269 $\pm$ 19                         |       |

**Table S4. Overview of the crystallization conditions of ROR $\gamma$ t.** Abbreviations: 20 $\alpha$ -hydroxycholesterol (20-OH), 25-hydroxycholesterol (25-OH), desmosterol (DSM), cholesterol (CHL) and compound 13 (CPD13).

| Ligands         | Crystallization Buffer                                   | P:B* (nl) | Cryoprotection                                                                    |
|-----------------|----------------------------------------------------------|-----------|-----------------------------------------------------------------------------------|
| 20-OH + MRL-871 | Empty**                                                  | -         | 1.6M AmSO <sub>4</sub> + 0.1M Tris + 25 % glycerol (pH=8.5)                       |
| 20-OH + FM26    | Empty**                                                  | -         | 1.6M AmSO <sub>4</sub> + 0.1M Tris + 25 % glycerol (pH=8.5)                       |
| 20-OH + CPD13   | Empty**                                                  | -         | 1.6M AmSO <sub>4</sub> + 0.1M Tris + 25 % glycerol (pH=8.5)                       |
| 25-OH + MRL-871 | 1.6M AmSO <sub>4</sub> + 0.1M Tris (pH=8.5)              | 800 : 400 | 1.6M AmSO <sub>4</sub> + 0.1M Tris + 25 % glycerol + 200 $\mu$ M MRL-871 (pH=8.5) |
| 25-OH + FM26    | 1.6M AmSO <sub>4</sub> + 0.1M Tris (pH=8.5)              | 800 : 400 | 1.6M AmSO <sub>4</sub> + 0.1M Tris + 25 % glycerol + 200 $\mu$ M FM26 (pH=8.5)    |
| 25-OH + CPD13   | 0.2M MgCl <sub>2</sub> + 6% PEG6000 + 0.1M Tris (pH=8.5) | 800 : 400 | 0.2M MgCl <sub>2</sub> + 6% PEG6000 + 0.1M Tris + 200 $\mu$ M CPD13 (pH=8.5)      |
| DSM + MRL-871   | 0.2M MgCl <sub>2</sub> + 6% PEG6000 + 0.1M Tris (pH=8.5) | 900 : 300 | 0.2M MgCl <sub>2</sub> + 6% PEG6000 + 0.1M Tris + 200 $\mu$ M MRL-871 (pH=8.5)    |
| DSM + FM26      | 1.2M AmSO <sub>4</sub> + 0.1M Tris (pH=8.5)              | 900 : 300 | 1.6M AmSO <sub>4</sub> + 0.1M Tris + 25 % glycerol + 200 $\mu$ M CPD13 (pH=8.5)   |
| DSM + CPD13     | 1.6M AmSO <sub>4</sub> + 0.1M Tris (pH=8.5)              | 800 : 400 | 1.6M AmSO <sub>4</sub> + 0.1M Tris + 25 % glycerol + 200 $\mu$ M FM26 (pH=8.5)    |
| CHL + MRL-871   | 0.2M MgCl <sub>2</sub> + 6% PEG6000 + 0.1M Tris (pH=8.5) | 800 : 400 | 0.2M MgCl <sub>2</sub> + 6% PEG6000 + 0.1M Tris + 200 $\mu$ M MRL-871 (pH=8.5)    |
| CHL + FM26      | 1.2M AmSO <sub>4</sub> + 0.1M Tris (pH=8.5)              | 800 : 400 | 1.6M AmSO <sub>4</sub> + 0.1M Tris + 25 % glycerol + 200 $\mu$ M FM26 (pH=8.5)    |
| CHL + CPD13     | 1.6M AmSO <sub>4</sub> + 0.1M Tris (pH=8.5)              | 800 : 400 | 1.6M AmSO <sub>4</sub> + 0.1M Tris + 25 % glycerol + 200 $\mu$ M CPD13 (pH=8.5)   |

\* Crystallization drop composition, protein-ligand solution volume (P) : crystallization buffer volume (B)

\*\* The protein ligand solution was evaporated using an empty buffer well

**Table S5.** Data collection and refinement statistics for RORyt in complex with both an orthosteric and an allosteric ligand. Abbreviations: 20 $\alpha$ -hydroxycholesterol (20-OH), 25-hydroxycholesterol (25-OH) and compound 13 (CPD13).

| <i>RORyt in complex with:</i>     | <i>20-OH + MRL-871</i> | <i>20-OH + FM26</i>     | <i>20-OH + CPD13</i>   | <i>25-OH + MRL-871</i> |
|-----------------------------------|------------------------|-------------------------|------------------------|------------------------|
| <i>Data collection</i>            |                        |                         |                        |                        |
| Space group                       | P 6 <sub>1</sub> 2 2   | P 6 <sub>1</sub> 2 2    | P 6 <sub>1</sub> 2 2   | P 6 <sub>1</sub> 2 2   |
| Cell dimensions                   |                        |                         |                        |                        |
| a, b, c (Å)                       | 108.52 108.52 105.94   | 108.50 108.50 99.29     | 108.32 108.32 99.33    | 108.64 108.64 107.67   |
| $\alpha$ , $\beta$ , $\gamma$ (°) | 90 90 120              | 90 90 120               | 90 90 120              | 90 90 120              |
| Resolution (Å)                    | 54.26-2.00 (2.07-2.00) | 54.25-1.62 (1.68- 1.62) | 54.16-1.71 (1.77-1.71) | 93.97-1.95 (2.02-1.95) |
| <i>I</i> / $\sigma$ ( <i>I</i> )  | 10.13 (0.27)           | 23.04 (2.69)            | 31.00 (0.88)           | 28.39 (1.63)           |
| Completeness (%)                  | 97.86 (82.70)          | 99.60 (96.99)           | 99.86 (99.62)          | 99.97 (100.00)         |
| Redundancy                        | 27.6 (8.2)             | 137.1 (73.2)            | 37.4 (37.3)            | 38.9 (38.0)            |
| CC <sub>1/2</sub>                 | 0.985 (0.551)          | 1.000 (0.977)           | 0.991 (0.219)          | 1.000 (0.741)          |
| <i>Refinement</i>                 |                        |                         |                        |                        |
| No. unique reflections            | 24921 (2070)           | 44254 (4235)            | 37646 (3706)           | 27179 (2667)           |
| Rwork/Rfree                       | 0.1923/0.2282          | 0.1478/0.1887           | 0.1596/0.2000          | 0.186/0.215            |
| No. atoms (non-H)                 |                        |                         |                        |                        |
| Protein                           | 1978                   | 2053                    | 2016                   | 2040                   |
| Ligand                            | 66                     | 73                      | 69                     | 66                     |
| Water                             | 64                     | 198                     | 176                    | 47                     |
| Average B-factors                 |                        |                         |                        |                        |
| Protein                           | 56.31                  | 29.44                   | 34.44                  | 61.26                  |
| Ligand                            | 46.63                  | 26.11                   | 31.76                  | 50.67                  |
| Water                             | 54.58                  | 42.05                   | 45.48                  | 57.05                  |
| R.m.s. deviations                 |                        |                         |                        |                        |
| Bond lengths (Å)                  | 0.007                  | 0.024                   | 0.013                  | 0.014                  |
| Bond angles (°)                   | 0.820                  | 1.850                   | 1.820                  | 1.710                  |
| Ramachandran                      |                        |                         |                        |                        |
| Favored/allowed (%)               | 97.9/2.1               | 98.8/1.2                | 99.2/0.8               | 98.8/1.2               |
| Outliers (%)                      | 0.0                    | 0.0                     | 0.0                    | 0.0                    |
| <i>PDB ID</i>                     | 6T4U                   | 6T4T                    | 6T4W                   | 6T4Y                   |



**Table S6.** Data collection and refinement statistics for RORyt in complex with both an orthosteric and an allosteric ligand. Abbreviations: 25-hydroxycholesterol (25-OH), desmosterol (DSM) and compound 13 (CPD13).

| <i>RORyt in complex with:</i>     | <i>25-OH + FM26</i>    | <i>25-OH + CPD13</i>   | <i>DSM + MRL-871</i>   | <i>DSM + FM26</i>      |
|-----------------------------------|------------------------|------------------------|------------------------|------------------------|
| <i>Data collection</i>            |                        |                        |                        |                        |
| Space group                       | P 6 <sub>1</sub> 2 2   |
| Cell dimensions                   |                        |                        |                        |                        |
| a, b, c (Å)                       | 108.88 108.88 98.54    | 108.33 108.33 108.51   | 108.32 108.32 108.52   | 108.91 108.91 98.48    |
| $\alpha$ , $\beta$ , $\gamma$ (°) | 90 90 120              | 90 90 120              | 90, 90, 120            | 90 90 120              |
| Resolution (Å)                    | 94.29-1.48 (1.53-1.48) | 48.46-1.87 (1.94-1.87) | 48.46-1.89 (1.95-1.89) | 47.66-1.79 (1.85-1.79) |
| <i>I</i> / $\sigma$ ( <i>I</i> )  | 25.51 (1.87)           | 35.83 (1.61)           | 35.74 (1.67)           | 22.70 (1.82)           |
| Completeness (%)                  | 99.99 (100.00)         | 99.96 (100.00)         | 99.97 (99.97)          | 99.98 (100.00)         |
| Redundancy                        | 39.1 (39.5)            | 39.1 (39.4)            | 39.1 (40.4)            | 39.0 (40.1)            |
| CC <sub>1/2</sub>                 | 1.000 (0.757)          | 1.000 (0.799)          | 1.000 (0.777)          | 1.000 (0.689)          |
| <i>Refinement</i>                 |                        |                        |                        |                        |
| No. unique reflections            | 30639 (2992)           | 31584 (3088)           | 30639 (2992)           | 32984 (3222)           |
| Rwork/Rfree                       | 0.1749/0.1852          | 0.1857/0.2108          | 0.1847/0.2055          | 0.175/0.197            |
| No. atoms (non-H)                 |                        |                        |                        |                        |
| Protein                           | 2055                   | 2040                   | 2175                   | 2046                   |
| Ligand                            | 73                     | 63                     | 71                     | 66                     |
| Water                             | 255                    | 241                    | 71                     | 186                    |
| Average B-factors                 |                        |                        |                        |                        |
| Protein                           | 28.79                  | 55.11                  | 59.92                  | 36.46                  |
| Ligand                            | 24.03                  | 42.73                  | 52.19                  | 32.77                  |
| Water                             | 42.38                  | 53.75                  | 56.28                  | 48.35                  |
| R.m.s. deviations                 |                        |                        |                        |                        |
| Bond lengths (Å)                  | 0.017                  | 0.015                  | 0.014                  | 0.009                  |
| Bond angles (°)                   | 1.790                  | 1.780                  | 1.760                  | 1.190                  |
| Ramachandran                      |                        |                        |                        |                        |
| Favored/allowed (%)               | 99.2/0.8               | 98.0/2.0               | 98.4/1.6               | 98.8/1.2               |
| Outliers (%)                      | 0.0                    | 0.0                    | 0.0                    | 0.0                    |
| <i>PDB ID</i>                     | 6T4X                   | 6T50                   | 6T4K                   | 6T4J                   |

**Table S7.** Data collection and refinement statistics for RORyt in complex with both an orthosteric and an allosteric ligand. Abbreviations: desmosterol (DSM), cholesterol (CHL) and compound 13 (CPD13).

| <i>RORyt in complex with:</i>     | <i>DSM + CPD13</i>     | <i>CHL + MRL-871</i>   | <i>CHL + FM26</i>     | <i>CHL + CPD13</i>     |
|-----------------------------------|------------------------|------------------------|-----------------------|------------------------|
| <i>Data collection</i>            |                        |                        |                       |                        |
| Space group                       | P 6 <sub>1</sub> 2 2   | P 6 <sub>1</sub> 2 2   | P 6 <sub>1</sub> 2 2  | P 6 <sub>1</sub> 2 2   |
| Cell dimensions                   |                        |                        |                       |                        |
| a, b, c (Å)                       | 108.73 108.73 104.73   | 107.96 107.96 107.42   | 108.51 108.51 105.04  | 108.86 108.86 98.64    |
| $\alpha$ , $\beta$ , $\gamma$ (°) | 90 90 120              | 90 90 120              | 90 90 120             | 90 90 120              |
| Resolution (Å)                    | 94.16-2.11 (2.16-2.10) | 46.75-1.84 (1.91-1.84) | 48.5-1.93 (2.00-1.93) | 98.64-1.75 (1.78-1.75) |
| <i>I</i> / $\sigma$ ( <i>I</i> )  | 10.2 (0.5)             | 29.39 (1.15)           | 27.97 (1.81)          | 8.7 (0.5)              |
| Completeness (%)                  | 99.4 (92.0)            | 98.75 (92.59)          | 99.97 (99.96)         | 100.0 (99.8)           |
| Redundancy                        | 37.6 (38.8)            | 32.8 (13.7)            | 39.0 (40.0)           | 37.3 (35.7)            |
| CC <sub>1/2</sub>                 | 0.999 (0.414)          | 1.000 (0.527)          | 1.000 (0.848)         | 0.998 (0.297)          |
| <i>Refinement</i>                 |                        |                        |                       |                        |
| No. unique reflections            | 21797 (1611)           | 32217 (2967)           | 28750 (2806)          | 35249 (1900)           |
| Rwork/Rfree                       | 0.196/0.235            | 0.191/0.214            | 0.178/0.213           | 0.178/0.212            |
| No. atoms (non-H)                 |                        |                        |                       |                        |
| Protein                           | 2005                   | 2053                   | 2030                  | 2042                   |
| Ligand                            | 62                     | 65                     | 66                    | 74                     |
| Water                             | 17                     | 113                    | 105                   | 181                    |
| Average B-factors                 |                        |                        |                       |                        |
| Protein                           | 66.01                  | 52.32                  | 52.30                 | 35.61                  |
| Ligand                            | 58.22                  | 45.29                  | 45.89                 | 39.38                  |
| Water                             | 56.45                  | 54.27                  | 53.92                 | 46.39                  |
| R.m.s. deviations                 |                        |                        |                       |                        |
| Bond lengths (Å)                  | 0.016                  | 0.015                  | 0.016                 | 0.017                  |
| Bond angles (°)                   | 2.100                  | 1.940                  | 1.890                 | 1.930                  |
| Ramachandran                      |                        |                        |                       |                        |
| Favored/allowed (%)               | 98.4/1.2               | 99.2/0.8               | 99.2/0.8              | 98.8/1.2               |
| Outliers (%)                      | 0.4                    | 0.0                    | 0.0                   | 0.0                    |
| <i>PDB ID</i>                     | 6TLT                   | 6T4I                   | 6T4G                  | 6TLQ                   |

**Movie S1 (separate file). Computational protein morph between the 6TLM and 6T50 structures using UCSF Chimera.** This morph highlights the clamping motion of helix 4 of ROR $\gamma$ t upon orthosteric ligand binding.
